# Supplementary material
Source: publisher figshare collection journal article supplement (https://tandf.figshare.com/ndownloader/files/14329877)
Supplement: Supplementary file 1 [file 14329877]

## Supplementary materials

Yuanyuan Lu, Alei Zhang, Xin Wang, Ning Hao\*, Kequan Chen and Pingkai Ouyang

State Key Laboratory of Materials-Oriented Chemical Engineering, College of Biotechnology and Pharmaceutical Engineering, Nanjing Tech University, Nanjing 211816, Jiangsu, China

\*Corresponding author: Ning Hao

Corresponding email: haoning@njtech.edu.cn

### Analysis of products

Fig.1 showed the HPLC-ELSD chromatograms of PC from egg yolk lecithin and the reaction products obtained from hydrolysis of PC using PLA<sub>1</sub>.

After the enzymatic hydrolysis, the PC consumption and the L- $\alpha$ -GPC production were obviously observed from the Fig.1 (b). PC was hydrolyzed into L- $\alpha$ -GPC and FFAs (free fatty acids). The retention time of 2.851 min, 5.403 min, 10.565 min were FFAs, PC and L- $\alpha$ -GPC, respectively.

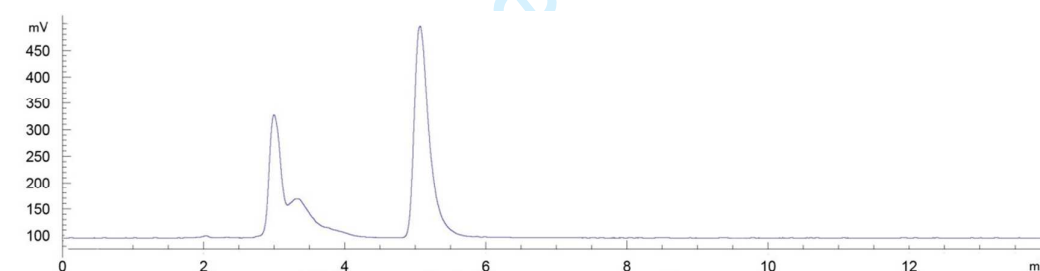

(a) Retention Time min

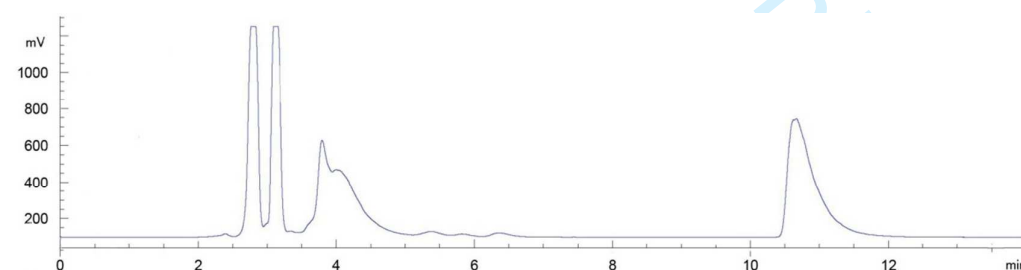

(b) Retention Time min

**Fig.1** HPLC-ELSD chromatograms of (a) egg yolk Lecithin (PC) and (b) reaction products obtained from hydrolysis of PC using PLA<sub>1</sub>.
